# Supplementary material for: Effects of RAC1 on Proliferation of Hen Ovarian Prehierarchical Follicle Granulosa Cells
Source: Animals (Basel). 2020 Sep 6;10(9):1589. doi: 10.3390/ani10091589 (PMC7552126; doi:10.3390/ani10091589)
Supplement: Supplementary file 1 [file animals-10-01589-s001.pdf]

# Supplementary Materials: Effects of RAC1 on Proliferation of Hen Ovarian Prehierarchical Follicle Granulosa Cells

Thobela Louis Tyasi <sup>1</sup>, Xue Sun <sup>1,2</sup>, Xuesong Shan <sup>1</sup>, Simushi Liswaniso <sup>1</sup>, Ignatius Musenge Chimbaka <sup>1</sup>, Ning Qin <sup>1,2,\*</sup> and Rifu Xu <sup>1,2,\*</sup>

<sup>1</sup> Department of Animal Genetics, Breeding and Reproduction, College of Animal Science and Technology, Jilin Agricultural University, Changchun 130118, China; louis.tyasi@ul.ac.za (T.L.T.); xuesun1128@163.com (Xue Sun) xsshshan@gmail.com (Xuesong Shan); smliswaniso@gmail.com (S.L.); ignatius.chimbaka@gmail.com (I.M.C.)

<sup>2</sup> Joint Laboratory of Modern Agricultural Technology International Cooperation, Ministry of Education, Jilin Agricultural University, Changchun 130118, China

\* Correspondence: ningqin@jlau.edu.cn (N.Q.); poultryxu@jlau.edu.cn (R.X.); Tel.: +86-150-4408-0931 (N.Q.)

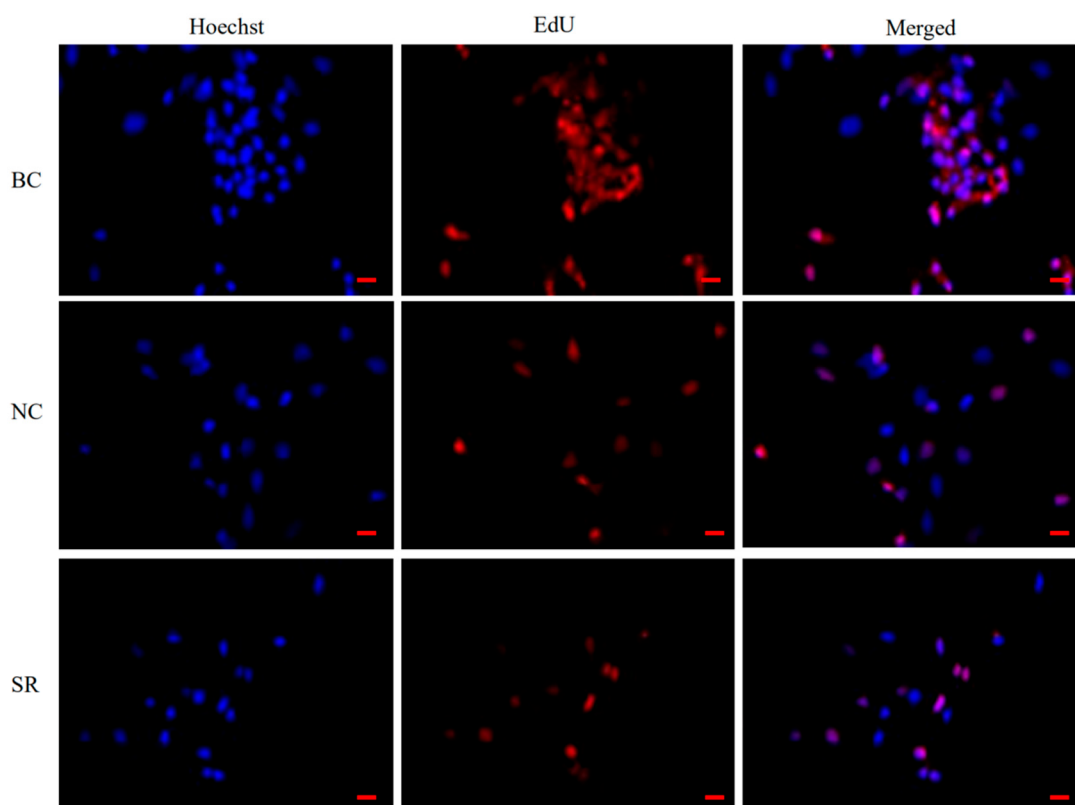

**Figure S1.** Effects of silencing *RAC1* on granulosa cell proliferation. The GCs were transfected with different treatment groups. SR group: exact siRNA *RAC1*; NC group: scrambled siRNA; BC group: absence of siRNA. All cell nuclei show blue fluorescence indicative of Hoechst33342 staining, the EdU-labeled cells showed red fluorescence indicating their newly synthesized DNA (original magnification  $\times 40$ ).

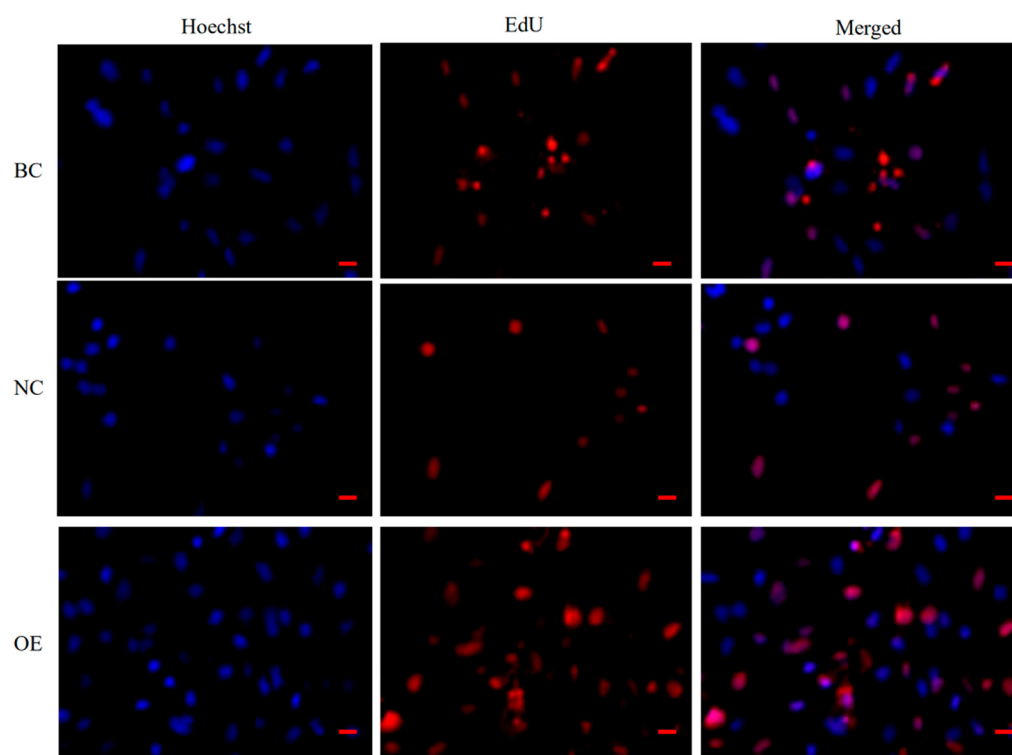

**Figure S2.** The effects EdU cell proliferation assay was used to assess the effects of overexpressing RAC1 on GC proliferation. The GCs were transfected with different treatment groups. OE group: pYr-adshuttle-4-RAC1 vector; NC group: pYr-adshuttle-4 empty vector; BC group: absence of expression vector. Blue fluorescence was seen in all cell nuclei since Hoechst33342 staining, cells labeled with red fluorescence suggesting their newly produced DNA (original magnification  $\times 40$ ).
